# Supplementary material
Source: Springer Nature journal article supplement (https://www.springermedizin.de/resource/supplementary/12894_2009_145_MOESM1_ESM.pdf/9514034)

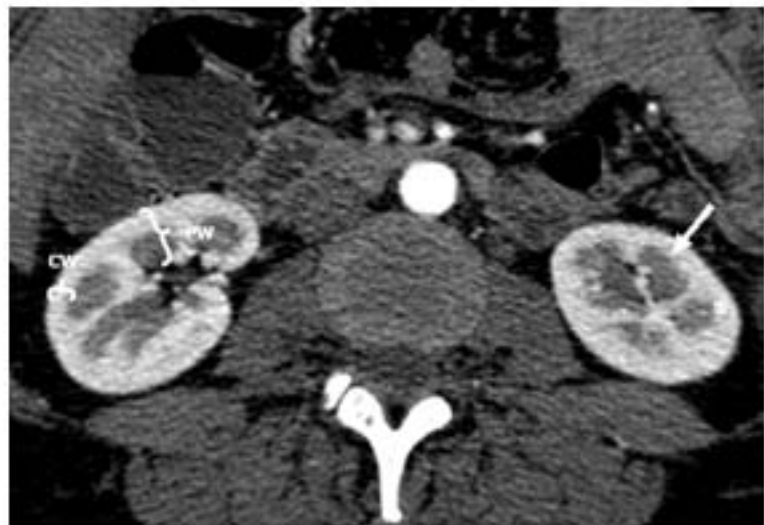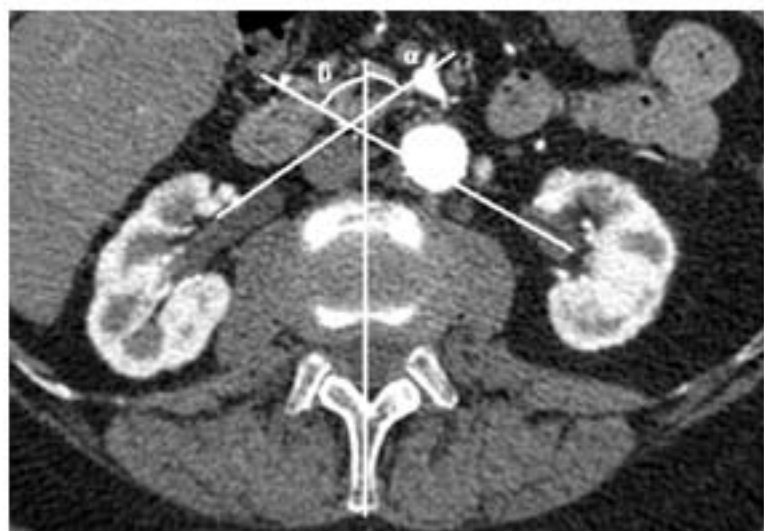

Supplement: MOESM1 [file 9514034]
